# Supplementary material
Source: ML conference proceedings conference paper supplement (https://openreview.net/forum?id=Mf3CwoSuvwv)
Supplement: supplementary_material [file attachment]

Table 4: Results of the inductive inference on miniImageNet in terms of accuracy (%).

| Variant   | 5-way 1-shot | 5-way 5-shot |
|-----------|--------------|--------------|
| inductive | 69.41        | 83.30        |

## 1 A Appendix

2 **Influence of the transductive inference** The transductive inference greatly improves our model  
3 compared to the inductive inference especially in 1-shot where the problem described in Section 3.4  
4 is more serious. To be fair, we adopt the inductive inference with our model and compare with other  
5 methods. As shown in Table 1 and Table 4, our model with the inductive inference still outperforms  
6 other methods, although the margins between them are not that much compared to the transductive  
7 inference.
